# Supplementary material for: Substituent engineering of the diboron molecular architecture for a nondoped and ultrathin emitting layer
Source: Royal Society of Chemistry journal article supplement (doi:10.1039/d2sc04725j), 2022-01-01
Supplement: d2sc04725j1.pdf [file d2sc04725j1.pdf]

## Electronic Supplementary Information

### **Substituent engineering of the diboron molecular architecture for a nondoped and ultrathin emitting layer**

Tien-Lin Wu,<sup>\*a</sup> Jian Lei,<sup>ab</sup> Chia-Min Hsieh,<sup>a</sup> Yi-Kuan Chen,<sup>a</sup> Pei-Yun Huang,<sup>a</sup> Po-Ting Lai,<sup>c</sup> Tsu-Yu Chou,<sup>c</sup> Wei-Chen Lin,<sup>d</sup> Wei Chen,<sup>d</sup> Chi-Hua Yu<sup>d</sup>, Liang-Yan Hsu,<sup>b</sup> Hao-Wu Lin<sup>c</sup> and Chien-Hong Cheng<sup>\*ac</sup>

<sup>a</sup> Department of Chemistry, National Tsing Hua University, Hsinchu, 300044, Taiwan

<sup>b</sup> Institute of Atomic and Molecular Sciences, Academia Sinica, Taipei 10617, Taiwan

<sup>c</sup> Department of Materials Science and Engineering, National Tsing Hua University, Hsinchu, 300044, Taiwan

<sup>d</sup> Department of Engineering Science, National Cheng Kung University, Tainan, 701, Taiwan

<sup>e</sup> Department of Chemistry, National Sun Yat-sen University, Kaohsiung, 80424, Taiwan

E-mail: [tlwu@mx.nthu.edu.tw](mailto:tlwu@mx.nthu.edu.tw)

E-mail: [chcheng@mx.nthu.edu.tw](mailto:chcheng@mx.nthu.edu.tw)

### Table of Contents:

|                                                                |     |
|----------------------------------------------------------------|-----|
| (A) General information.....                                   | S1  |
| (B) Synthesis and characterization of iCzDBA.....              | S1  |
| (C) X-ray diffraction and single-crystal analysis.....         | S6  |
| (D) DFT methods and molecular dynamics.....                    | S8  |
| (E) Photophysical properties.....                              | S10 |
| (F) Characteristics of nondoped and ultrathin EML devices..... | S12 |

## Electronic Supplementary Information (ESI)

### (A) General information

**Chemical and characterization.** All the experimental operations were performed under nitrogen; the equipment was dried in an oven at 110 °C for several hours. Starting material chemicals and reagents were purchased from commercial providers without further purification. Diethyl ether and toluene were distilled over sodium particles. NMR spectra using CHCl<sub>3</sub>/CDCl<sub>3</sub> ( $\delta$  7.24/77.0 ppm) were recorded with a Varian Mercury 400 spectrometer. High-resolution mass (HRMS) was performed on JMS-T200GC AccuTOF GCx in field desorption (FD) source mode in the Instrumentation Center at NCTU. The single crystal suitable for X-ray diffraction was grown by sublimation. The X-ray diffraction was carried out on a Bruker X8 APEX X-ray diffractometer with Mo  $K\alpha$  radiation ( $\lambda = 0.71073 \text{ \AA}$ ) and the structure was solved by SHELX 97 program in the Instrumentation Center at NTHU. Elemental analyses were performed using an analyzer (vario EL cube, Elementar) in Instrumentation Center at NCHU.

### (B) Synthesis and characterization of iCzDBA

**Scheme S1** Synthesis of 9-(4-bromo-3,5-diisopropylphenyl)-9H-carbazole and iCzDBA.

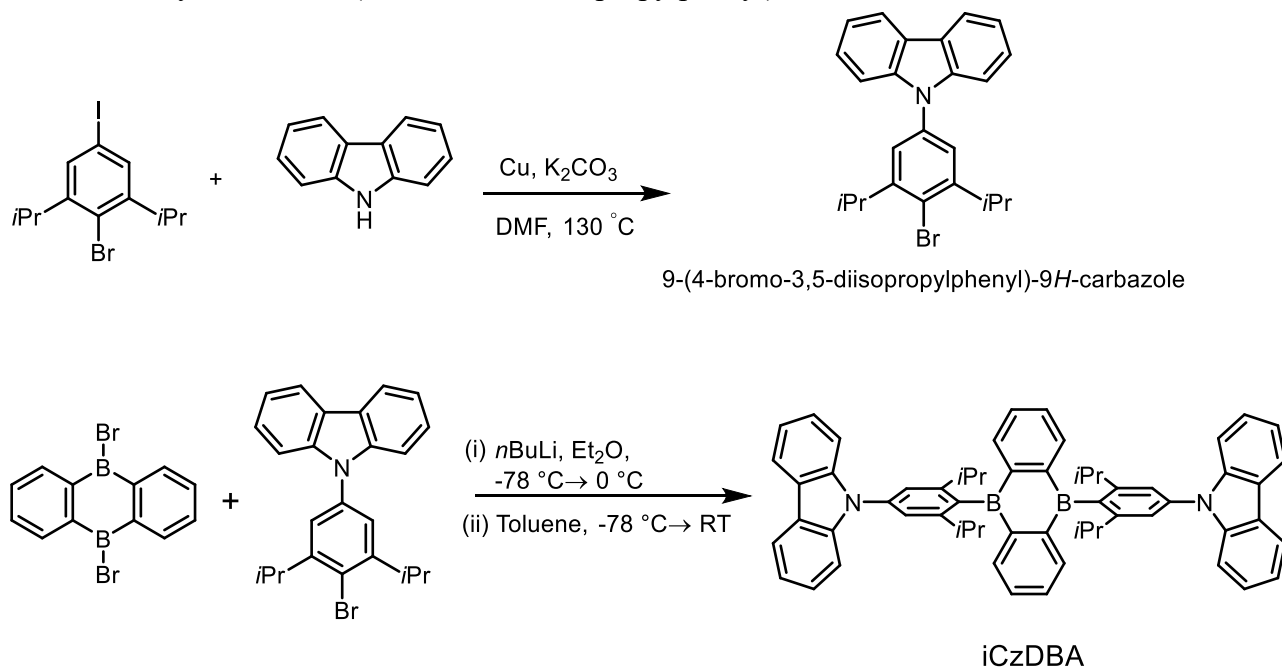

**Synthesis of 9-(4-bromo-3,5-diisopropylphenyl)-9H-carbazole.** Under N<sub>2</sub> atmosphere, a stirred suspension of 2-bromo-5-iodo-1,3-diisopropylbenzene (2.00 g, 5.45 mmol), carbazole (1.00 g, 5.96 mmol), copper powder (1.06 g, 16.67 mmol), potassium carbonate (2.30 g, 16.67 mmol) and anhydrous N,N-dimethylmethanamide (16 mL) was heated at 130 °C for 24 h. The resulting mixture was filtered through Celite and extracted by dichloromethane/water. Organic phase was dried (MgSO<sub>4</sub>) and removed in vacuo, and purified by column chromatography (silica gel, eluent: hexane/dichloromethane

## Electronic Supplementary Information (ESI)

= 10:1) to give the product as a white solid (1.95 g, 88%).  $^1\text{H}$  NMR (400 MHz,  $\text{CDCl}_3$ ):  $\delta$  8.14 (d,  $J$  = 8.0 Hz, 2H), 7.43-7.36 (m, 4 H), 7.32 (s, 2 H) 7.30-7.26 (m, 2 H), 3.61 (sep,  $J$  = 6.8 Hz, 2 H), 1.28 (d,  $J$  = 6.8 Hz, 12 H).  $^{13}\text{C}$  NMR (100 MHz,  $\text{CDCl}_3$ ):  $\delta$  149.7, 140.6, 137.0, 126.0, 124.6, 123.4, 122.7, 120.4, 119.9, 109.7, 33.8, 23.0. FD-HRMS Calcd for  $\text{C}_{24}\text{H}_{24}\text{BrN}$ : 405.1087. Found: 405.1081.

**Synthetic procedure of iCzDBA.** Under  $\text{N}_2$  atmosphere,  $n\text{BuLi}$  (2.5 M in hexane, 3.6 mL, 9.0 mmol) was added dropwise to a stirred solution of 9-(4-bromo-3,5-diisopropylphenyl)-9*H*-carbazole (2.4 g, 6.0 mmol) in an anhydrous  $\text{Et}_2\text{O}$  (170 mL) at  $-78\text{ }^\circ\text{C}$ , and then the reaction mixture was warmed to  $0\text{ }^\circ\text{C}$  within 30 min. A solution of 9,10-dibromo-9,10-diboraanthracene (1.0 g, 3.0 mmol) in dry toluene (75 mL) was then added dropwise to reaction mixture at  $-78\text{ }^\circ\text{C}$ . the reaction mixture was stirred overnight at room temperature. The mixture was extracted by  $\text{NH}_4\text{Cl}_{(\text{aq})}$  (60 mL) and dichloromethane (60 mL). All volatiles were removed in vacuo and the residue was further purified by column chromatography (silica gel, eluent: hexane/dichloromethane = 2:1) to obtain iCzDBA as a yellow solid (2.00 g, 81%). The compound was further purified by the temperature-gradient vacuum sublimation (under  $10^{-6}$  torr), and the sublimed compound was used for chemical characterization, photophysical measurement, and device fabrication.  $^1\text{H}$  NMR (400 MHz,  $\text{CDCl}_3$ ):  $\delta$  8.19 (d,  $J$  = 7.6 Hz, 4 H), 7.81 (dd,  $J$  = 3.2, 5.4 Hz, 4 H), 7.63-7.59 (m, 8 H), 7.48 (td,  $J$  = 1.1, 7.1 Hz, 4 H), 7.43 (s, 4 H), 7.31 (td,  $J$  = 0.8, 7.0 Hz, 4 H), 2.57 (sep,  $J$  = 6.8 Hz, 4 H), 1.14 (d,  $J$  = 6.8 Hz, 24 H).  $^{13}\text{C}$  NMR (100 MHz,  $\text{CDCl}_3$ ):  $\delta$  151.3, 140.8, 139.0, 133.3, 125.8, 123.4, 120.3, 119.7, 110.1, 35.7, 24.1. FD-HRMS Calcd for  $\text{C}_{52}\text{H}_{40}\text{B}_2\text{N}_2$ : 826.4643. Found: 826.4644. Anal. Calcd for  $\text{C}_{52}\text{H}_{40}\text{B}_2\text{N}_2$ : C, 87.17; H, 6.83; N, 3.39. Found: C, 87.58; H, 6.64; N, 3.51.

# Electronic Supplementary Information (ESI)

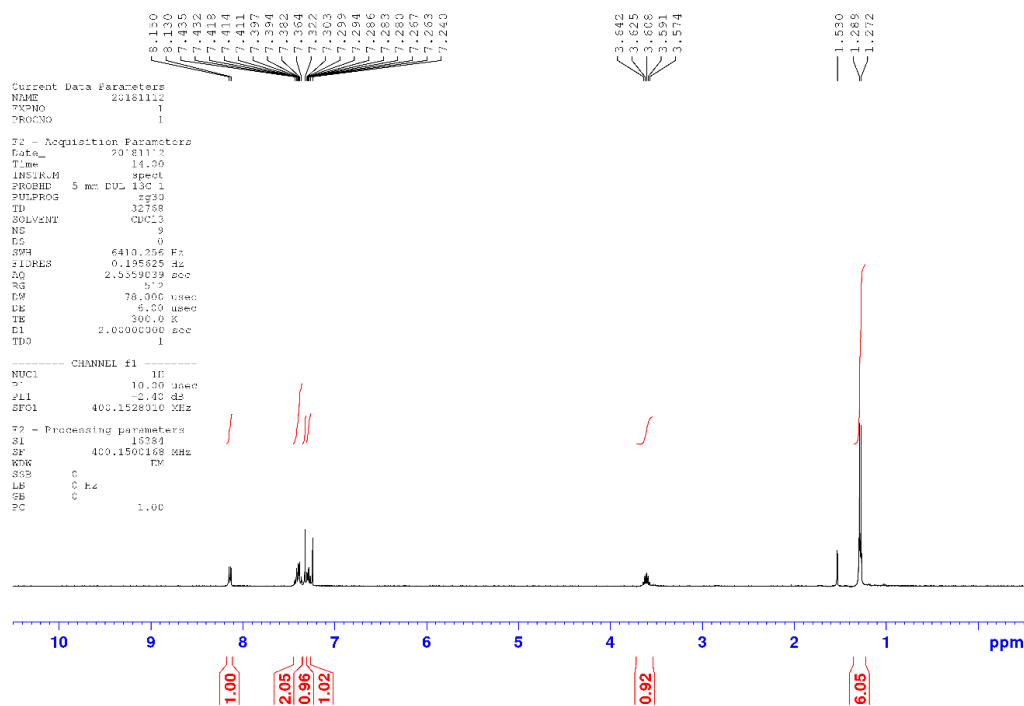

Fig. S1 <sup>1</sup>H NMR spectrum of 9-(4-bromo-3,5-diisopropylphenyl)-9H-carbazole.

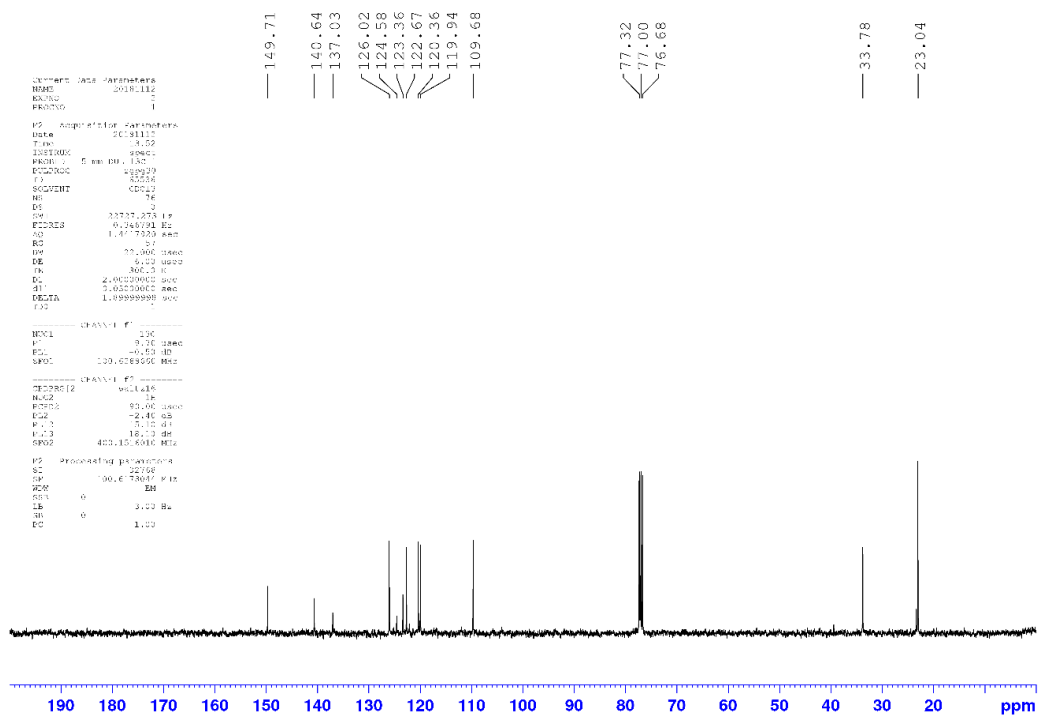

Fig. S2 <sup>13</sup>C NMR spectrum of 9-(4-bromo-3,5-diisopropylphenyl)-9H-carbazole.

# Electronic Supplementary Information (ESI)

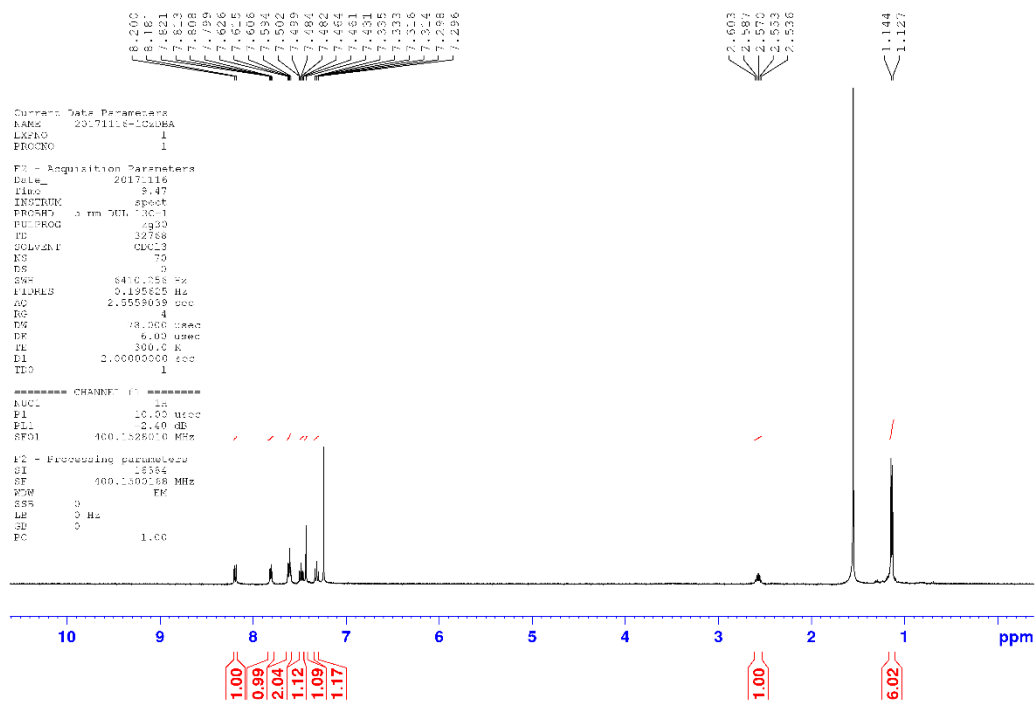

Fig. S3 <sup>1</sup>H NMR spectrum of iCzDBA.

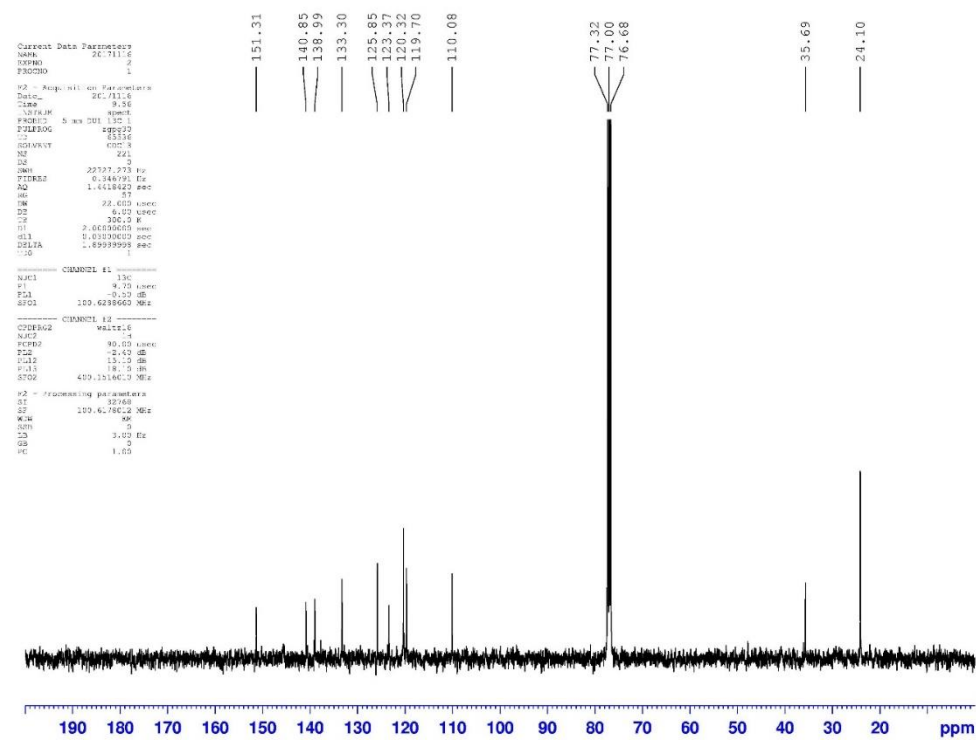

Fig. S4 <sup>13</sup>C NMR spectrum of iCzDBA.

## Electronic Supplementary Information (ESI)

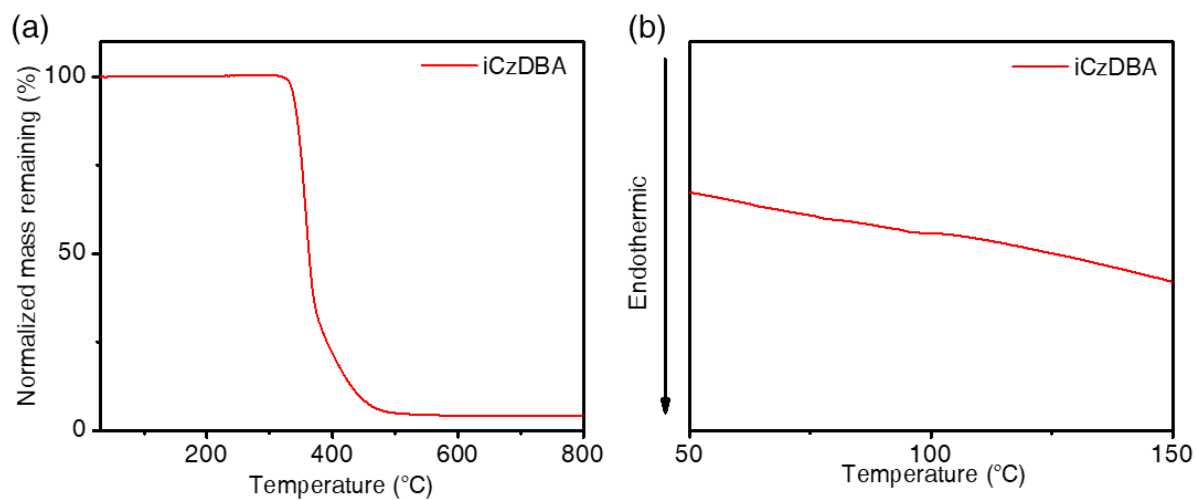

**Fig. S5** (a) The thermal gravimetric analysis of iCzDBA. (b) The differential scanning calorimetry of iCzDBA.

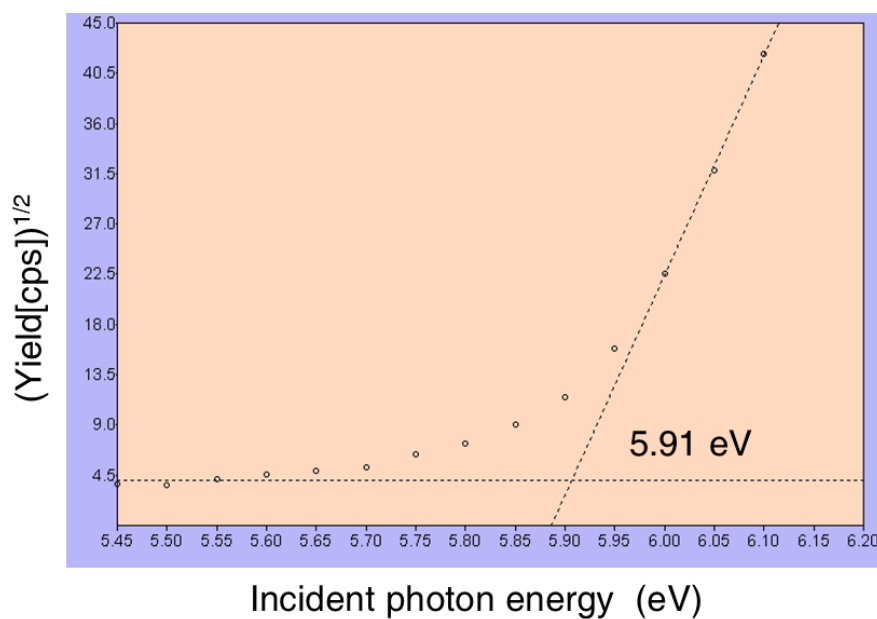

**Fig. S6** The photoelectron spectrum of iCzDBA neat film.

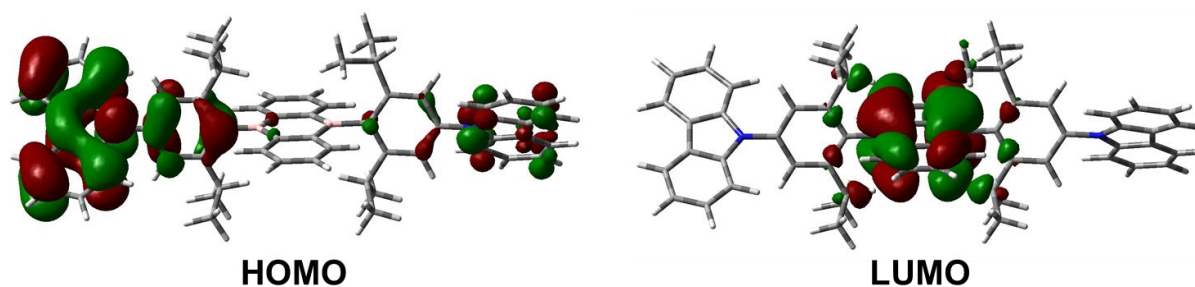

**Fig. S7** Calculated HOMO/LUMO distributions of iCzDBA.

## Electronic Supplementary Information (ESI)

### (C) X-ray diffraction and single-crystal analysis

**Table S1** The crystal data and structure refinements of CzDBA, iCzDBA and *t*BuCzDBA.

| Material                                           | CzDBA                                                             | iCzDBA                                                            | <i>t</i> BuCzDBA                                                  |
|----------------------------------------------------|-------------------------------------------------------------------|-------------------------------------------------------------------|-------------------------------------------------------------------|
| Empirical formula                                  | C <sub>52</sub> H <sub>40</sub> B <sub>2</sub> N <sub>2</sub>     | C <sub>60</sub> H <sub>56</sub> B <sub>2</sub> N <sub>2</sub>     | C <sub>68</sub> H <sub>72</sub> B <sub>2</sub> N <sub>2</sub>     |
| Formula weight [g mol <sup>-1</sup> ]              | 714.48                                                            | 826.68                                                            | 938.89                                                            |
| Temperature [K]                                    | 200(2)                                                            | 100(2)                                                            | 100(2)                                                            |
| Wavelength [Å]                                     | 0.71073                                                           | 1.54178                                                           | 0.71073                                                           |
| Crystal system                                     | Monoclinic                                                        | Monoclinic                                                        | Triclinic                                                         |
| Space group                                        | <i>C</i> 2/ <i>c</i>                                              | <i>P</i> 2 <sub>1</sub> / <i>c</i>                                | <i>P</i> -1                                                       |
| <i>a</i> [Å]                                       | 26.1224(8)                                                        | 27.7304(12)                                                       | 9.5981(5)                                                         |
| <i>b</i> [Å]                                       | 8.3077(3)                                                         | 9.0103(4)                                                         | 11.9160(5)                                                        |
| <i>c</i> [Å]                                       | 18.9832(6)                                                        | 18.6100(8)                                                        | 25.0597(11)                                                       |
| $\alpha$ [°]                                       | 90                                                                | 90                                                                | 85.521(2)                                                         |
| $\beta$ [°]                                        | 106.476(2)                                                        | 98.171(2)                                                         | 89.469(2)                                                         |
| $\gamma$ [°]                                       | 90                                                                | 90                                                                | 89.876(2)                                                         |
| Volume [Å <sup>3</sup> ]                           | 3950.5(2)                                                         | 4602.7(3)                                                         | 2857.2(2)                                                         |
| <i>Z</i>                                           | 4                                                                 | 4                                                                 | 2                                                                 |
| Density (calculated) [Mg m <sup>-3</sup> ]         | 1.201                                                             | 1.193                                                             | 1.091                                                             |
| Absorption coefficient [mm <sup>-1</sup> ]         | 0.068                                                             | 0.509                                                             | 0.062                                                             |
| <i>F</i> (000)                                     | 1504                                                              | 1760                                                              | 1008                                                              |
| Crystal size [mm <sup>3</sup> ]                    | 0.42×0.26×0.09                                                    | 0.20×0.17×0.06                                                    | 0.15×0.14×0.12                                                    |
| Theta range for data collection [°]                | 2.72 to 25.05                                                     | 1.609 to 66.688                                                   | 0.815 to 26.432                                                   |
| Index ranges                                       | -30≤ <i>h</i> ≤30<br>-8≤ <i>k</i> ≤9<br>-22≤ <i>l</i> ≤21         | -33≤ <i>h</i> ≤33<br>-10≤ <i>k</i> ≤7<br>-22≤ <i>l</i> ≤22        | -12≤ <i>h</i> ≤6<br>-14≤ <i>k</i> ≤14<br>-30≤ <i>l</i> ≤31        |
| Reflections collected                              | 12578                                                             | 36127                                                             | 46207                                                             |
| Independent reflections                            | 3422<br>[ <i>R</i> (int) = 0.0340]                                | 8142<br>[ <i>R</i> (int) = 0.0269]                                | 11612<br>[ <i>R</i> (int) = 0.0474]                               |
| Absorption correction                              | multi-scan                                                        | Semi-empirical from equivalents                                   | Semi-empirical from equivalents                                   |
| Max. and min. transmission                         | 0.9939 and 0.9718                                                 | 0.9492 and 0.7249                                                 | 0.9485 and 0.8865                                                 |
| Refinement method                                  | Full-matrix least-squares on <i>F</i> <sup>2</sup>                | Full-matrix least-squares on <i>F</i> <sup>2</sup>                | Full-matrix least-squares on <i>F</i> <sup>2</sup>                |
| Data / restraints / parameters                     | 3422 / 0 / 253                                                    | 8142 / 0 / 585                                                    | 11612 / 264 / 745                                                 |
| Goodness-of-fit on <i>F</i> <sup>2</sup>           | 1.018                                                             | 1.026                                                             | 1.046                                                             |
| Final <i>R</i> indices [ <i>I</i> >2σ( <i>I</i> )] | <i>R</i> <sub>1</sub> = 0.0558<br><i>wR</i> <sub>2</sub> = 0.1639 | <i>R</i> <sub>1</sub> = 0.0381<br><i>wR</i> <sub>2</sub> = 0.0961 | <i>R</i> <sub>1</sub> = 0.0680<br><i>wR</i> <sub>2</sub> = 0.1751 |
| <i>R</i> indices (all data)                        | <i>R</i> <sub>1</sub> = 0.0782<br><i>wR</i> <sub>2</sub> = 0.1786 | <i>R</i> <sub>1</sub> = 0.0404<br><i>wR</i> <sub>2</sub> = 0.0981 | <i>R</i> <sub>1</sub> = 0.1124<br><i>wR</i> <sub>2</sub> = 0.1989 |
| Largest diff. peak and hole                        | 0.258 and -0.453 e.Å <sup>-3</sup>                                | 0.245 and -0.255 e.Å <sup>-3</sup>                                | 0.295 and -0.282 e.Å <sup>-3</sup>                                |

## Electronic Supplementary Information (ESI)

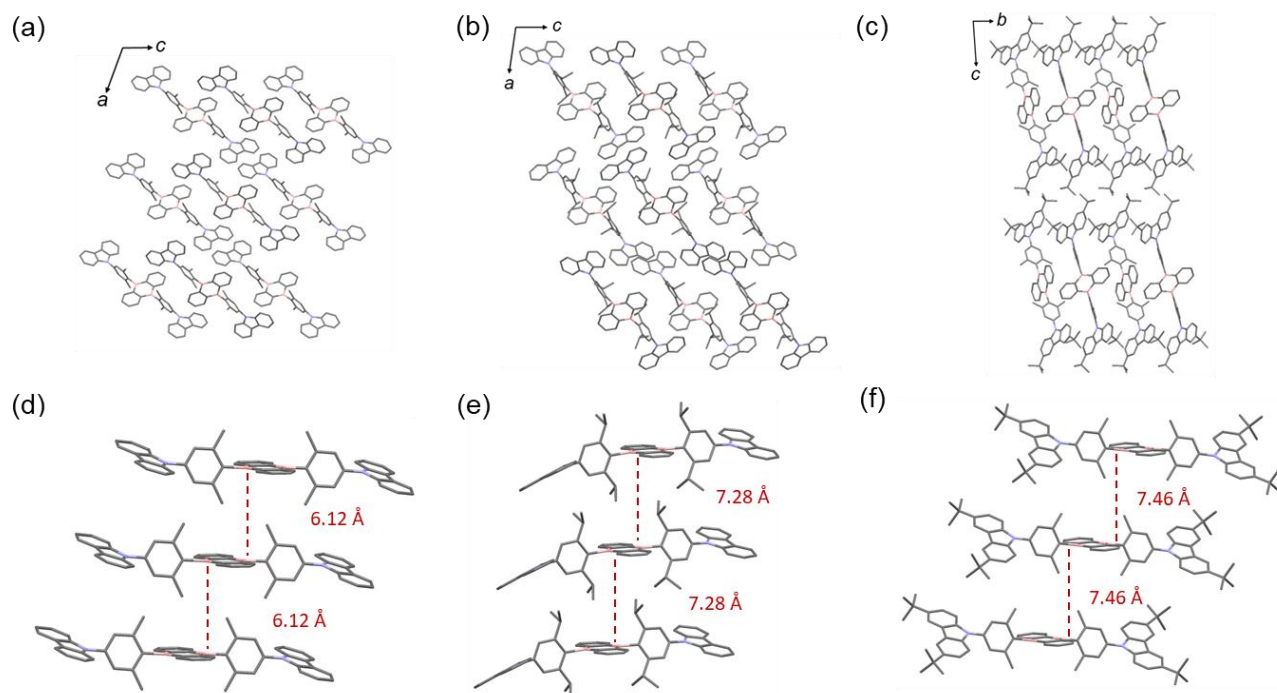

**Fig. S8** The crystal packing of (a) CzDBA, (b) iCzDBA, and (c) tBuCzDBA. And the closest distances in single-crystal cell of (d) CzDBA, (e) iCzDBA, and (f) tBuCzDBA. All hydrogen atoms in three structures have been omitted for clarity.

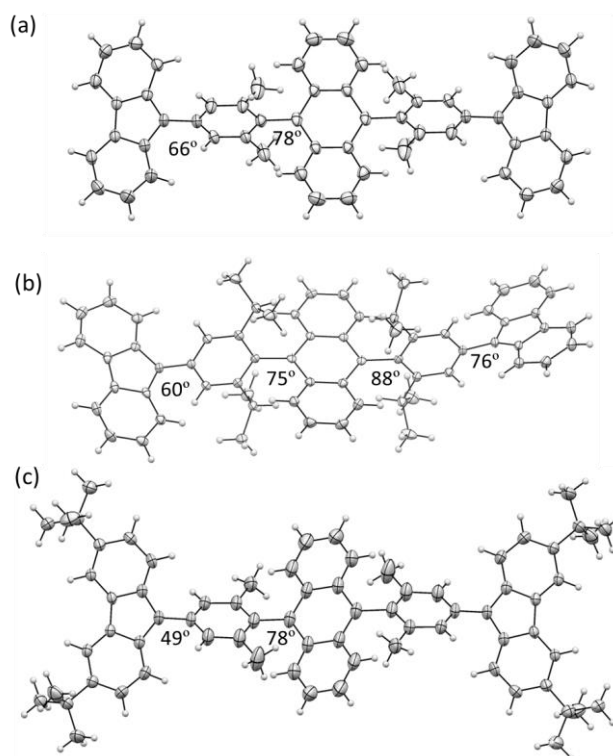

**Fig. S9** The x-ray single-crystal structures and their dihedral angles for (a) CzDBA, (b) iCzDBA, and (c) tBuCzDBA.



## Electronic Supplementary Information (ESI)

### (D) DFT methods and molecular dynamics

**Table S2** Comparison of experimental and calculated singlet ( $S_1$ ), triplet ( $T_1$ ), and  $\Delta E_{ST}$

| Methods         | $S_1$            | $T_1$ | $\Delta E_{ST}$ | $S_1$ | $T_1$ | $\Delta E_{ST}$ | $S_1$  | $T_1$ | $\Delta E_{ST}$ |
|-----------------|------------------|-------|-----------------|-------|-------|-----------------|--------|-------|-----------------|
|                 | [eV]             | [eV]  | [eV]            | [eV]  | [eV]  | [eV]            | [eV]   | [eV]  | [eV]            |
|                 | <i>t</i> BuCzDBA |       |                 | CzDBA |       |                 | iCzDBA |       |                 |
| Experiment      | 2.486            | 2.464 | 0.022           | 2.629 | 2.596 | 0.033           | 2.607  | 2.574 | 0.033           |
| B3LYP           | 1.894            | 1.887 | 0.007           | 2.034 | 2.023 | 0.011           | 2.100  | 2.091 | 0.009           |
| CAM-B3LYP       | 3.112            | 2.683 | 0.428           | 3.189 | 2.681 | 0.508           | 3.275  | 2.728 | 0.547           |
| PBE0            | 2.088            | 2.076 | 0.012           | 2.225 | 2.207 | 0.018           | 2.298  | 2.283 | 0.016           |
| BMK             | 2.551            | 2.517 | 0.034           | 2.655 | 2.616 | 0.039           | 2.729  | 2.685 | 0.044           |
| M06-2X          | 3.017            | 2.763 | 0.254           | 3.097 | 2.759 | 0.337           | 3.186  | 2.836 | 0.350           |
| $\omega$ B97X-D | 3.364            | 2.783 | 0.581           | 3.425 | 2.780 | 0.645           | 3.485  | 2.839 | 0.645           |

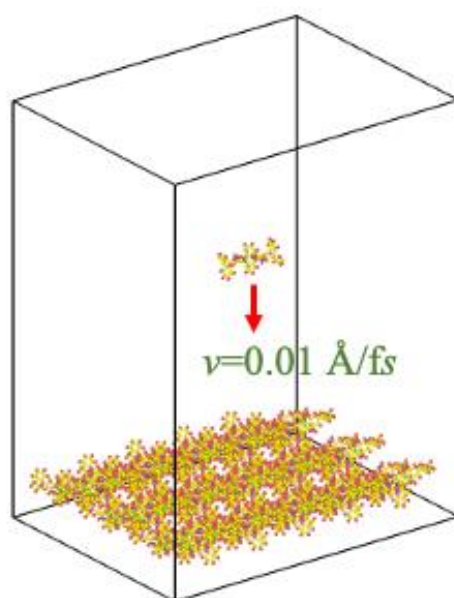

**Fig. S10** The model setup for nonequilibrium molecular dynamics, periodic boundary conditions were applied along  $x$ ,  $y$  and  $z$  directions. DBA molecule was subject to an initial velocity  $v=0.01$  Å/fs from the top of simulation box and deposited to the substrate for every 5 ps.

## Electronic Supplementary Information (ESI)

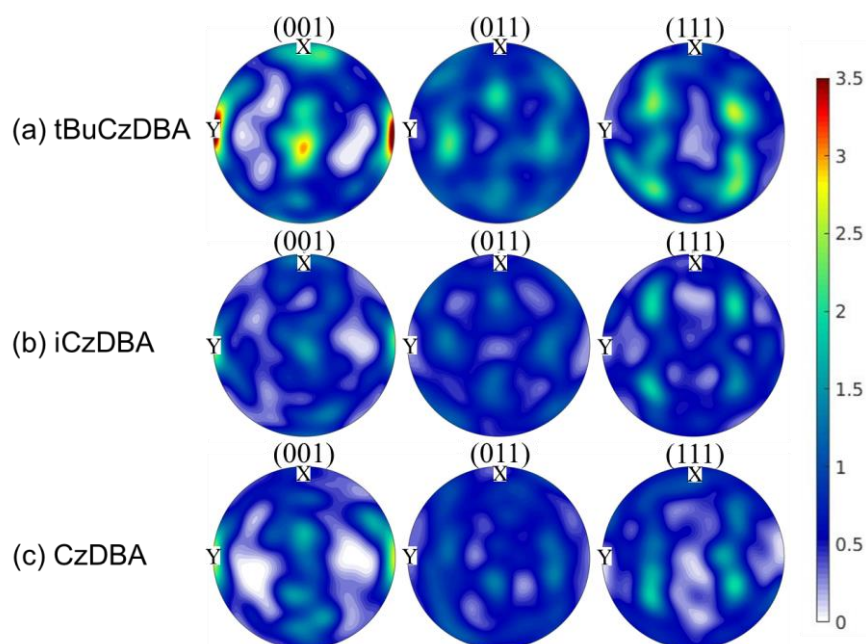

**Fig. S11** The orientation of amorphous layer using stereographic projections. Panel (a) shows the pole figure of *t*BuCzDBA layer in (001), (011), and (111) direction. (b) shows the pole figure of *i*CzDBA layer in (001), (011), and (111) direction and (c) shows the pole figure of CzDBA layer in (001), (011) and (111) direction.

**Table S3** Parameters of nonequilibrium molecular dynamics

| Compound                                    | CzDBA                          | <i>i</i> CzDBA                 | BuCzDBA                        |
|---------------------------------------------|--------------------------------|--------------------------------|--------------------------------|
| Box size[Å <sup>3</sup> ]                   | 85×113×144                     | 93×96×160                      | 98×83×138                      |
| Forcefield                                  | Dreiding                       | Dreiding                       | Dreiding                       |
| Boundary                                    | Periodic                       | Periodic                       | Periodic                       |
| Deposition temperature                      | 600K                           | 600K                           | 600K                           |
| Deposition velocity                         | 5 ps per molecule<br>0.01 Å/fs | 5 ps per molecule<br>0.01 Å/fs | 5 ps per molecule<br>0.01 Å/fs |
| Cooling temperature                         | NVT 300K                       | NVT 300K                       | NVT 300K                       |
| Cooling time [ps]                           | 1000                           | 1000                           | 1000                           |
| Time step [fs]                              | 1                              | 1                              | 1                              |
| Number of deposited molecules after cooling | 48                             | 53                             | 57                             |

(E) Photophysical properties

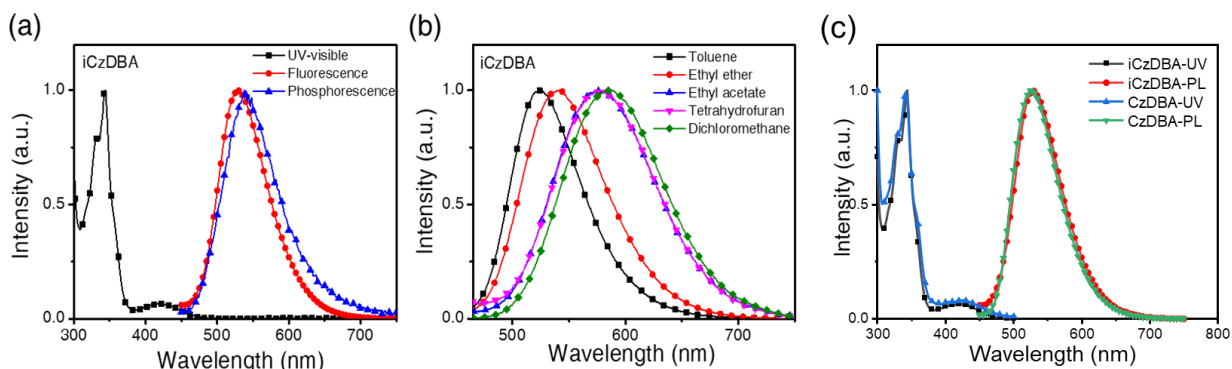

**Fig. S12** (a) The UV-Vis absorption (black line) and fluorescence spectra (red line, Fl) of iCzDBA measured at 300 K in toluene ( $10^{-5}$  M) and CBP film (10 wt%). The phosphorescence (blue line, Ph) spectrum measured at 77 K in CBP film (10 wt%). (b) The PL spectra of iCzDBA at 300 K measured in various solvents. (c) The UV-Vis absorption spectra of iCzDBA (black line) and CzDBA (blue line); PL spectra of iCzDBA (red line) and CzDBA (green line) measured at 300 K in CBP film (10 wt%).

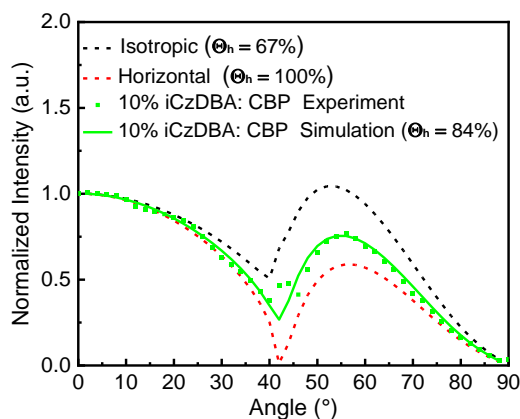

**Fig. S13** The variable-angle PL measurement of 10 wt% iCzDBA in CBP films.

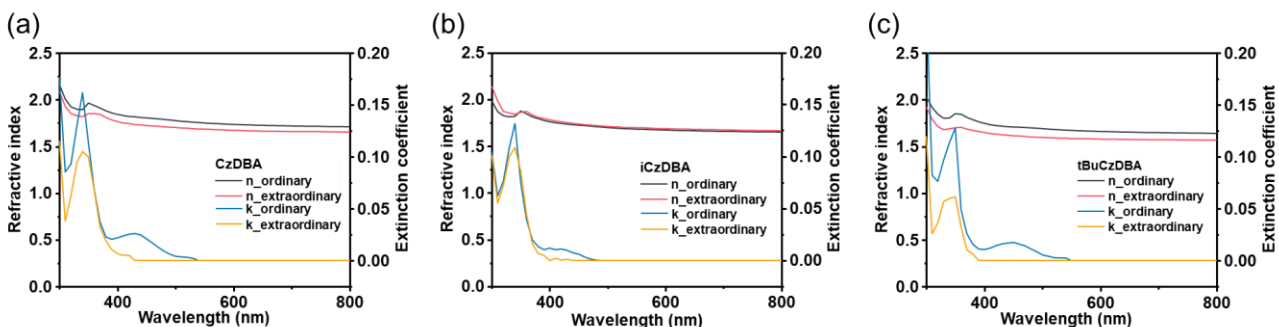

**Fig. S14** Refractive indices ( $n$ ) and extinction coefficient ( $k$ ) of (a) CzDBA, (b) iCzDBA, and (c) *t*BuCzDBA.

## Electronic Supplementary Information (ESI)

**Table S4** Photophysical properties of all DBA emitters

| Emitter          | Doped film <sup>a)</sup>  |                          |                          |                                        |                           |                                 | Neat film <sup>b)</sup>  |                           |                                 |
|------------------|---------------------------|--------------------------|--------------------------|----------------------------------------|---------------------------|---------------------------------|--------------------------|---------------------------|---------------------------------|
|                  | Abs<br>[nm] <sup>a)</sup> | Fl<br>[nm] <sup>a)</sup> | Ph<br>[nm] <sup>a)</sup> | $\Delta E_{ST}$<br>[meV] <sup>a)</sup> | PLQY<br>[%] <sup>a)</sup> | $\Theta_h$<br>[%] <sup>a)</sup> | Fl<br>[nm] <sup>b)</sup> | PLQY<br>[%] <sup>b)</sup> | $\Theta_h$<br>[%] <sup>b)</sup> |
| CzDBA            | 342                       | 524                      | 520                      | 33                                     | 100                       | 84                              | 540                      | 90.6                      | 88                              |
| iCzDBA           | 344                       | 528                      | 538                      | 33                                     | 95.2                      | 84                              | 538                      | 88.0                      | 77                              |
| <i>t</i> BuCzDBA | 348                       | 553                      | 557                      | 22                                     | 86.0                      | 83                              | 561                      | 84.0                      | 92                              |

Photophysical properties of <sup>a)</sup>doped (10% DBAs: 90% CBP) film and <sup>b)</sup>DBAs neat film: Absorption (Abs), fluorescence (Fl) maximum at 300 K and phosphorescence (Ph) maximum at 77 K in 30-nm-thick films, the energy gap ( $\Delta E_{ST}$ ) was difference between  $S_1$  and  $T_1$ . Absolute total PLQY of 50 nm-thick films using an integrating sphere.  $\Theta_h$  was measured and fitted by using the variable-angle PL measurement of 30 nm-thick films.

**Table S5** Transient PL results and rate constants of DBA compounds

|                                | $\tau_p$<br>[ns] <sup>e)</sup> | $\tau_d$<br>[ $\mu$ s] <sup>c)</sup> | $\Phi_p$<br>[%] <sup>d)</sup> | $\Phi_d$<br>[%] <sup>d)</sup> | $k_p$<br>[ $10^7$ s <sup>-1</sup> ] <sup>e)</sup> | $k_d$<br>[ $10^6$ s <sup>-1</sup> ] <sup>f)</sup> | $k_r$<br>[ $10^6$ s <sup>-1</sup> ] <sup>g)</sup> | $k_{IC}$<br>[ $10^6$ s <sup>-1</sup> ] <sup>h)</sup> | $k_{ISC}$<br>[ $10^7$ s <sup>-1</sup> ] <sup>i)</sup> | $k_{RISC}$<br>[ $10^6$ s <sup>-1</sup> ] <sup>j)</sup> |
|--------------------------------|--------------------------------|--------------------------------------|-------------------------------|-------------------------------|---------------------------------------------------|---------------------------------------------------|---------------------------------------------------|------------------------------------------------------|-------------------------------------------------------|--------------------------------------------------------|
| CzDBA <sup>a)</sup>            | 34                             | 1.0                                  | 38.4                          | 52.2                          | 2.94                                              | 1.00                                              | 11.3                                              | 1.17                                                 | 1.69                                                  | 2.36                                                   |
| <i>t</i> BuCzDBA <sup>a)</sup> | 36                             | 1.2                                  | 34.7                          | 49.3                          | 2.78                                              | 0.83                                              | 9.64                                              | 1.84                                                 | 1.63                                                  | 2.02                                                   |
| iCzDBA <sup>a)</sup>           | 65                             | 1.4                                  | 32.7                          | 55.3                          | 1.54                                              | 0.71                                              | 5.03                                              | 0.69                                                 | 0.97                                                  | 1.92                                                   |
| iCzDBA <sup>b)</sup>           | 29                             | 2.9                                  | 17.0                          | 78.2                          | 3.45                                              | 0.34                                              | 5.86                                              | 0.30                                                 | 2.83                                                  | 1.93                                                   |

<sup>a)</sup> DBA compounds measured in neat films at 300 K. <sup>b)</sup> 10 wt% iCzDBA measured in CBP film (30 nm) at 300 K. <sup>c)</sup> The prompt lifetime ( $\tau_p$ ) component and the delayed lifetime ( $\tau_d$ ). <sup>d)</sup> The prompt fluorescent ( $\Phi_p$ ) component and the delayed fluorescent ( $\Phi_d$ ) component of PLQY. <sup>e)</sup> The rate constant of prompt component ( $k_p$ ). <sup>f)</sup> The rate constant of delayed component ( $k_d$ ). <sup>g)</sup> The rate constant of radiative decay ( $k_r$ ). <sup>h)</sup> The rate constant of internal conversion ( $k_{IC}$ ). <sup>i)</sup> The rate constant of intersystem crossing ( $k_{ISC}$ ). <sup>j)</sup> The rate constant of reverse intersystem crossing ( $k_{RISC}$ ).

The rate constants of DBA compounds were determined by using reported methods as the following equations:

$$k_p = 1/\tau_p \quad (S1)$$

$$k_d = 1/\tau_d \quad (S2)$$

$$k_r = \Phi_p/\tau_p \quad (S3)$$

$$\Phi_p + \Phi_d = k_r/(k_r + k_{IC}) \quad (S4)$$

$$\Phi_p = k_r/(k_r + k_{IC} + k_{ISC}) \quad (S5)$$

$$\Phi_{ISC} = k_{ISC}/(k_r + k_{IC} + k_{ISC}) \quad (S6)$$

$$\Phi_{RISC} = \Phi_d/\Phi_{ISC} \quad (S7)$$

$$k_{RISC} = \frac{k_p k_d \Phi_d}{k_{ISC} \Phi_p} \quad (S8)$$

(F) Characteristics of nondoped and ultrathin EML devices

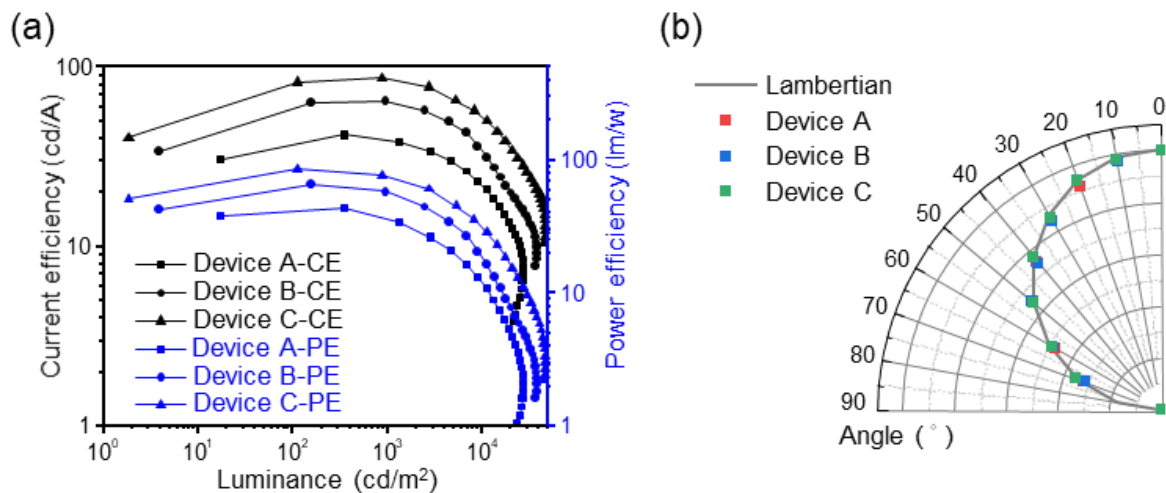

**Fig. S15** (a) Current efficiency (CE) and power efficiency (PE) versus luminance plot of device A, B, and C. (b) Angular dependence of EL intensities with the Lambertian distributions of device A, B and C. The emission distributions of three devices are nearly Lambertian pattern.

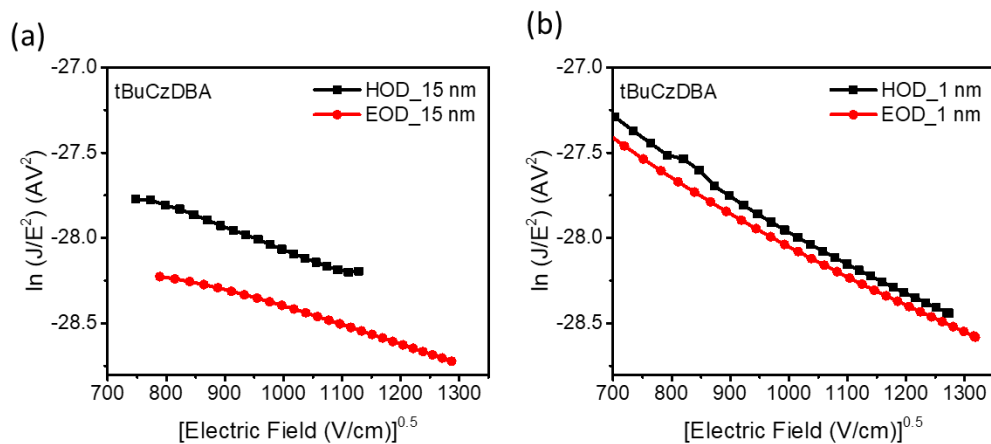

**Fig. S16** The hole-only device (HOD) and electron-only device (EOD) of (a) 15 nm *t*BuCzDBA and (b) 1 nm *t*BuCzDBA.

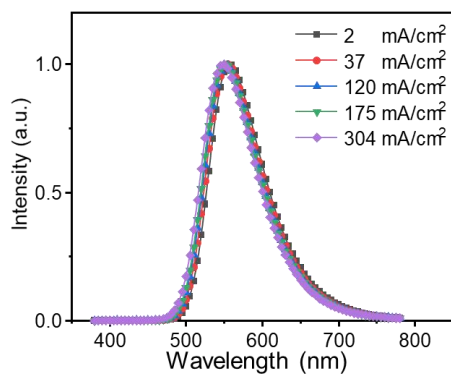

**Fig. S17** The EL spectra of device U3 at various current densities.

## Electronic Supplementary Information (ESI)

**Table S6** Charge mobilities of *t*BuCzDBA

| Thickness              | 1 nm                          |                               | 15 nm                         |                               |
|------------------------|-------------------------------|-------------------------------|-------------------------------|-------------------------------|
|                        | $\mu_e$ (cm <sup>2</sup> /Vs) | $\mu_h$ (cm <sup>2</sup> /Vs) | $\mu_e$ (cm <sup>2</sup> /Vs) | $\mu_h$ (cm <sup>2</sup> /Vs) |
| <b><i>t</i>BuCzDBA</b> | 1.64*10 <sup>-6</sup>         | 1.78*10 <sup>-6</sup>         | 6.48*10 <sup>-6</sup>         | 1.13*10 <sup>-5</sup>         |

**Table S7** Summary of recent nondoped TADF OLEDs with EQE near or over 20%

| Material         | $\lambda_{EL}$ (nm) | $V_{on}$ (V) | $\eta_{EQE}$ (%) | CE (cd/A) | PE (lm/W) | Thickness (nm) | Reference                                                    |
|------------------|---------------------|--------------|------------------|-----------|-----------|----------------|--------------------------------------------------------------|
| <i>t</i> BuCzDBA | 558                 | 2.4          | 26.9             | 86.9      | 86.3      | 15             | This work                                                    |
| <i>t</i> BuCzDBA | 553                 | 2.2          | 24.5             | 82.9      | 95.3      | 5              | This work                                                    |
| <i>t</i> BuCzDBA | 552                 | 2.1          | 22.0             | 70.2      | 88.2      | 1              | This work                                                    |
| DMAC-DPS         | 480                 | 4.3          | 19.5             | -         | 19        | 30             | <i>Adv. Mater.</i> <b>2015</b> , <i>27</i> , 2096            |
| DMAC-BP          | 510                 | 2.6          | 18.9             | -         | 59        | 30             | <i>Adv. Mater.</i> <b>2015</b> , <i>27</i> , 2096            |
| DMAC-TRZ         | 500                 | 3            | 20               | 61.1      | 45.7      | 20             | <i>Chem. Commun.</i> <b>2015</b> , <i>51</i> , 13662         |
| B-oTC            | 474                 | 3.9          | 19.1             | 37.3      | 27.6      | 40             | <i>Angew. Chem. Int. Ed.</i> <b>2017</b> , <i>56</i> , 15006 |
| MPAc-BS          | 487                 | 3.4          | 22.8             | 49.9      | 41.4      | 30             | <i>Adv. Funct. Mater.</i> <b>2018</b> , <i>28</i> , 1802031  |
| DCB-BP-PXZ       | 548                 | 2.5          | 22.6             | 72.9      | 81.8      | 35             | <i>Angew. Chem. Int. Ed.</i> <b>2018</b> , <i>57</i> , 9290  |
| CzDBA            | 560                 | 2.1          | 19               | -         | 87        | 80             | <i>Nat. Photon.</i> <b>2019</b> , <i>13</i> , 765            |
| 2Cz-DPS          | 518                 | 4.1          | 28.7             | 82.3      | 51.8      | 30             | <i>Chem. Sci.</i> <b>2019</b> , <i>10</i> , 8129             |
| 2tCz2CzBn        | 470                 | 2.7          | 21.6             | 31.1      | -         | 30             | <i>Adv. Sci.</i> <b>2020</b> , <i>7</i> , 1902508            |
| TP2P-PXZ         | 548                 | 2.6          | 25.4             | 84.1      | 96.5      | 20             | <i>Angew. Chem. Int. Ed.</i> <b>2021</b> , <i>60</i> , 25878 |
| CzPh2AQ          | 575                 | ~5.5         | 22.1             | 54.4      | 28.5      | 28             | <i>Chem. Eng. J.</i> <b>2022</b> , <i>442</i> , 136219       |
| 3CPDA-MPC        | 525                 | 4.6          | 26.5             | 65.0      | 42.1      | 30             | <i>Adv. Funct. Mater.</i> <b>2022</b> , 2112881              |
| 9CPDA-MPC        | 510                 | 3.6          | 29.6             | 84.1      | 64.4      | 30             | <i>Adv. Funct. Mater.</i> <b>2022</b> , 2112881              |
